# Supplementary material for: The natural history of ataxia-telangiectasia (A-T): A systematic review
Source: PubMed Central journal article supplement (PMC9049793; doi:10.1371/journal.pone.0264177), 2022-03-15
Supplement: pone.0264177.s003.pdf [file pone.0264177.s003.pdf]

## Supplementary tables

Table S1 – Outcome definitions

| Outcome                            | Definition                                                                                                                                                                                                                                                                                                                    |
|------------------------------------|-------------------------------------------------------------------------------------------------------------------------------------------------------------------------------------------------------------------------------------------------------------------------------------------------------------------------------|
| <b>Delay in diagnosis</b>          | Time between presentation to a clinician and the time of diagnosis.                                                                                                                                                                                                                                                           |
| <b>Presenting sign or symptom</b>  | The first sign or symptom that a parent, child, or adult notices that leads to a diagnosis of A-T                                                                                                                                                                                                                             |
| <b>Gait ataxia</b>                 | 'Cerebellar gait ataxia', 'gait ataxia', 'unsteady gait' with a diagnosis of A-T or 'staggering gait' with a diagnosis of A-T.                                                                                                                                                                                                |
| <b>Dysarthria</b>                  | Author reported dysarthria, or slurred speech with a diagnosis of A-T                                                                                                                                                                                                                                                         |
| <b>Recurrent infection</b>         | Any infection reported as recurrent by the authors of the study, or when 3 or more episodes of the same infection have been reported in 1 year.                                                                                                                                                                               |
| <b>Impaired cognitive function</b> | Documented as impaired by authors of the paper, or IQ documented at 80 or less                                                                                                                                                                                                                                                |
| <b>Immunoglobulins</b>             | A result was regarded as low, normal or high based on the normal ranges documented within each study. Alternatively they were included in the analysis if the study documented that specific immunoglobulin results was low, normal or high. The normal ranges varied slightly. Units of measure were converted if necessary. |

Table S2 – Study type definitions

| Study type                   | Definition                                                                                                                     |
|------------------------------|--------------------------------------------------------------------------------------------------------------------------------|
| <b>Case report</b>           | Single case of A-T described in the study.                                                                                     |
| <b>Case series</b>           | More than 1 case described in detail, generally as individual cases in the same study.                                         |
| <b>Cohort study</b>          | A longitudinal study of a group of people with A-T where individual cases are not described in detail.                         |
| <b>Cross-sectional study</b> | Results were collected at one moment in time and the cases were not described in detail, or were grouped together for analysis |
| <b>Interventional study</b>  | Participants received an intervention.                                                                                         |
| <b>Case-control study</b>    | A group of people with A-T were compared to a control group, a group of people without A-T.                                    |
| <b>Qualitative study</b>     | A descriptive study in which non-numerical data was collected.                                                                 |
| <b>Prevalence study</b>      | A whole population with a particular feature was studied at a particular point in time.                                        |

*Many articles had multiple study types within them. In this case the most appropriate type of study compared to the definitions above was selected. The same data was collected for all study types.*

Table S3 – Reported antenatal problems

| Antenatal problem                      | Number of studies (references) | Number with antenatal problem |
|----------------------------------------|--------------------------------|-------------------------------|
| <b>Total number</b>                    | <b>65</b>                      | <b>180</b>                    |
| <b>Total with antenatal problem</b>    | <b>12</b>                      | <b>21</b>                     |
| <b>Undefined antenatal problems</b>    | 1                              | 4                             |
| Breech delivery                        | 2                              | 2                             |
| <b>Antepartum bleeding</b>             | 4                              | 4                             |
| Low birth weight                       | 1                              | 1                             |
| Forceps delivery                       | 1                              | 2                             |
| Signs of fetal hypoxia                 | 1                              | 1                             |
| Maternal pyelitis                      | 1                              | 1                             |
| Premature rupture of membranes (PROM)  | 1                              | 1                             |
| Intrauterine growth restriction (IUGR) | 1                              | 1                             |
| Seizures                               | 1                              | 1                             |
| Rubella contact                        | 1                              | 1                             |
| Hyperemesis                            | 1                              | 1                             |
| Single nuchal cord                     | 1                              | 1                             |
| <b>No antenatal problems</b>           | <b>53</b>                      | <b>263</b>                    |

Table S4 – Reported birth weight and gestation

| Birth weight             | n  | Range (kg)  | IQR (kg)    |
|--------------------------|----|-------------|-------------|
| <b>Overall</b>           | 41 | 1.30 – 4.08 | 2.38 – 3.30 |
| <b>Term infants</b>      | 21 | 1.9 – 4.08  | 2.25 – 3.25 |
| <b>Unknown gestation</b> | 18 | 1.3 – 3.9   | 2.6 – 3.4   |

Table S5 – Reported postnatal problems

| Postnatal concern                      | Number of studies (references) | N  | Age                            |
|----------------------------------------|--------------------------------|----|--------------------------------|
| <b>Number of cases reported</b>        | <b>35</b>                      | 46 | N/A                            |
| <b>Postnatal concerns</b>              | <b>12</b>                      | 23 | N/A                            |
| <b>Abnormal newborn screening</b>      | 5                              | 15 | N/A                            |
| <b>Jaundice</b>                        | 4                              | 4  | 32 weeks, 39 weeks x 2 unknown |
| <b>Neonatal asphyxia</b>               | 2                              | 2  | Unknown                        |
| <b>Neonatal resuscitation required</b> | 1                              | 1  | Unknown                        |
| <b>Abnormal sutures</b>                | 1                              | 1  | >37 weeks                      |
| <b>Poor feeding</b>                    | 1                              | 1  | 32 weeks                       |
| <b>Oxygen in neonatal period</b>       | 2                              | 2  | Unknown                        |
| <b>No postnatal concerns</b>           | <b>23</b>                      | 23 | 11 x >37 weeks, 11 x unknown   |

## S6 – Detailed cause of death

| Cause of death                                            | Number of studies<br>(references) | All cases          |                             | Variant cases      |                          | Classical cases    |                           |
|-----------------------------------------------------------|-----------------------------------|--------------------|-----------------------------|--------------------|--------------------------|--------------------|---------------------------|
|                                                           |                                   | Number<br>of cases | Age of death<br>(months)    | Number<br>of cases | Age of death<br>(months) | Number<br>of cases | Age of death<br>(months)  |
| <b>Neurological</b>                                       |                                   |                    |                             |                    |                          |                    |                           |
| <b>Acute increase<br/>in ICP</b>                          | 1<br>[278]                        | 2                  | n = 2<br>336.0, 336.0       | 0                  | Not applicable           | 2                  | n=2<br>336.0, 336.0       |
| <b>Unspecified<br/>disease</b>                            | 1<br>[874]                        | 10                 | Not reported                | 0                  | Not applicable           | 10                 | Not reported              |
| <b>Complication of<br/>raised ICP</b>                     | 1<br>[668]                        | 5                  | Not reported                | 0                  | Not applicable           | 5                  | Not reported              |
| <b>Encephalopathy</b>                                     | 1<br>[160]                        | 1                  | n=1<br>32.0                 | 0                  | Not applicable           | 1                  | Not reported              |
| <b>Widespread<br/>thrombotic<br/>microangiopath<br/>y</b> | 1<br>[693]                        | 1                  | n = 1<br>384.0              | 0                  | Not applicable           | 1                  | n=1<br>384.0              |
| <b>NEUROLOGICAL<br/>TOTAL</b>                             | N/A                               | 18                 | n = 3<br>32.0, 336.0, 336.0 | 0                  | Not applicable           | 18                 | n=3<br>32.0, 336.0, 336.0 |
| <b>A-T related</b>                                        |                                   |                    |                             |                    |                          |                    |                           |
| <b>A-T (not<br/>specified)</b>                            | 1<br>[951]                        | 1                  | n=1<br>192.0                | 0                  | Not applicable           | 1                  | n=1<br>96.0               |

| Cause of death               | Number of studies (references) | All cases       |                                                              | Variant cases   |                       | Classical cases |                                                              |
|------------------------------|--------------------------------|-----------------|--------------------------------------------------------------|-----------------|-----------------------|-----------------|--------------------------------------------------------------|
|                              |                                | Number of cases | Age of death (months)                                        | Number of cases | Age of death (months) | Number of cases | Age of death (months)                                        |
| <b>Complications of A-T</b>  | 3<br>[818, 866, 951]           | 5               | n=3<br>64.8, 134.4, 288.0                                    | 0               | Not applicable        | 5               | n=3<br>64.8, 134.4, 288.0                                    |
| <b>General deterioration</b> | 1<br>[467]                     | 1               | n=1<br>108.0                                                 | 0               | Not applicable        | 1               | n=1<br>120.0                                                 |
| <b>Disease Progression</b>   | 1<br>[474]                     | 1               | n=1<br>84.0                                                  | 0               | Not applicable        | 1               | n=1<br>126.0                                                 |
| <b>A-T TOTAL</b>             | N/A                            | 8               | n=6<br>median (range, IQR)<br>121.2 (64.8-288.0, 90.0-177.6) | 0               | Not applicable        | 8               | n=6<br>median (range, IQR)<br>121.2 (64.8-288.0; 90.0-177.6) |

#### Haemorrhage/Bleeding

|                             |                      |   |                           |   |                |   |                           |
|-----------------------------|----------------------|---|---------------------------|---|----------------|---|---------------------------|
| <b>Unspecified Bleeding</b> | 1<br>[881]           | 2 | Not reported              | 0 | Not applicable | 2 | Not reported              |
| <b>Bladder haemorrhage</b>  | 2<br>[52, 448]       | 2 | n=1<br>360.0              | 0 | Not applicable | 2 | n=1<br>132.0              |
| <b>Cerebral haemorrhage</b> | 3<br>[347, 789, 949] | 3 | n=3<br>36.0, 312.0, 408.0 | 0 | Not applicable | 2 | n=3<br>36.0, 312.0, 408.0 |
| <b>GI haemorrhage</b>       | 1<br>[575]           | 1 | n=1<br>180.0              | 0 | Not applicable | 1 | n=1<br>144.0              |

| Cause of death                   | Number of studies (references) | All cases       |                                                               | Variant cases   |                       | Classical cases |                                                               |
|----------------------------------|--------------------------------|-----------------|---------------------------------------------------------------|-----------------|-----------------------|-----------------|---------------------------------------------------------------|
|                                  |                                | Number of cases | Age of death (months)                                         | Number of cases | Age of death (months) | Number of cases | Age of death (months)                                         |
| <b>Haemoptysis</b>               | 1<br>[116]                     | 1               | n=1<br>132.0                                                  | 0               | Not applicable        | 1               | n=1<br>180.0                                                  |
| <b>Urinary tract haemorrhage</b> | 2<br>[24, 49]                  | 2               | n=2<br>264.0, 264.0                                           | 0               | Not applicable        | 2               | n=2<br>264.0, 264.0                                           |
| <b>BLEEDING TOTAL</b>            | N/A                            | 11              | n=8<br>median (range, IQR) 264.0<br>(36.0-408.0, 168.0-324.0) | 0               | Not applicable        | 11              | n=8<br>median (range, IQR) 264.0<br>(36.0-408.0, 168.0-324.0) |

#### Malignancy

|                        |                                                     |    |                                                                |   |                            |    |                                                                |
|------------------------|-----------------------------------------------------|----|----------------------------------------------------------------|---|----------------------------|----|----------------------------------------------------------------|
| <b>ALL</b>             | 10<br>[24, 35, 36, 52, 87, 229, 339, 376, 532, 626] | 15 | n=12<br>median (range, IQR)<br>134.0 (48.0-612.0, 69.0-221.5)  | 3 | n=3<br>156.0, 612.0, 612.0 | 12 | n=9<br>median (range, IQR)<br>72.0 (48.0-238.0, 60.0-188.0)    |
| <b>AML</b>             | 1<br>[264]                                          | 1  | n=1<br>120.0                                                   | 0 | Not applicable             | 1  | n=1<br>120.0                                                   |
| <b>B-cell lymphoma</b> | 4<br>[24, 177, 614, 789]                            | 9  | n=9<br>median (range, IQR) 132.0<br>(120.0-480.0, 120.0-204.0) | 0 | Not applicable             | 9  | n=9<br>median (range, IQR) 132.0<br>(120.0-480.0, 120.0-204.0) |
| <b>Breast cancer</b>   | 3<br>[24, 28, 36]                                   | 4  | n=4<br>median (range) 396.0 (324.0-564.0)                      | 2 | n=2<br>396.0, 564.0        | 2  | n=2<br>324.0, 396.0                                            |

| Cause of death                  | Number of studies (references) | All cases       |                                                               | Variant cases   |                       | Classical cases |                                                               |
|---------------------------------|--------------------------------|-----------------|---------------------------------------------------------------|-----------------|-----------------------|-----------------|---------------------------------------------------------------|
|                                 |                                | Number of cases | Age of death (months)                                         | Number of cases | Age of death (months) | Number of cases | Age of death (months)                                         |
| <b>Burkitt's lymphoma</b>       | 4<br>[87, 626, 696, 758]       | 10              | n=7<br>median (range, IQR) 196.0<br>(59.0-230.0, 114.0-220.5) | 0               | Not applicable        | 10              | n=7<br>median (range, IQR)<br>196.0 (59.0-230.0; 114.0-220.5) |
| <b>Cerebellar tumour</b>        | 1<br>[296]                     | 1               | n=1<br>156.0                                                  | 0               | Not applicable        | 1               | n=1<br>156.0                                                  |
| <b>CML</b>                      | 1<br>[24]                      | 1               | n=1<br>564.0                                                  | 1               | n=1<br>564.0          | 0               | Not applicable                                                |
| <b>Ectopic pituitary tumour</b> | 1<br>[52]                      | 1               | n=1<br>276.0                                                  | 1               | n=1<br>276.0          | 0               | Not applicable                                                |
| <b>Fetal hepatoblastoma</b>     | 1<br>[869]                     | 1               | n=1<br>168.0                                                  | 0               | Not applicable        | 1               | n=1<br>288.0                                                  |
| <b>Gallbladder malignancy</b>   | 1<br>[72]                      | 1               | n=1<br>840.0                                                  | 0               | Not applicable        | 1               | n=1<br>840.0                                                  |
| <b>Gastric adenocarcinoma</b>   | 1<br>[91]                      | 1               | n=1<br>312.0                                                  | 0               | Not applicable        | 1               | n=1<br>372.0                                                  |
| <b>Gastric cancer</b>           | 2<br>[185, 782]                | 2               | n=1<br>168.0                                                  | 0               | Not applicable        | 2               | n=1<br>372.0                                                  |

| Cause of death                     | Number of studies (references)                  | All cases       |                                                                | Variant cases   |                       | Classical cases |                                                                |
|------------------------------------|-------------------------------------------------|-----------------|----------------------------------------------------------------|-----------------|-----------------------|-----------------|----------------------------------------------------------------|
|                                    |                                                 | Number of cases | Age of death (months)                                          | Number of cases | Age of death (months) | Number of cases | Age of death (months)                                          |
| <b>HD lymphocyte depleted</b>      | 1<br>[626]                                      | 2               | n=2<br>152.0, 249.0                                            | 0               | Not applicable        | 2               | n=2<br>152.0, 249.0                                            |
| <b>HD with nodular sclerosis</b>   | 1<br>[626]                                      | 2               | n=2<br>85.0, 215.0                                             | 0               | Not applicable        | 2               | n=2<br>85.0, 215.0                                             |
| <b>Hepatocellular carcinoma</b>    | 7<br>[24, 49, 52, 225, 294, 789, 811]           | 7               | n=7<br>median (range, IQR)<br>168.0 (120.0-444.0, 120.0-420.0) | 1               | n=1<br>396.0          | 5               | n=5<br>median (range, IQR)<br>144.0 (120.0-444.0; 120.0-375.0) |
| <b>Hepatoma</b>                    | 2<br>[312, 810]                                 | 2               | n=1<br>204.0                                                   | 0               | Not applicable        | 2               | n=1<br>204.0                                                   |
| <b>HL</b>                          | 9<br>[24, 52, 87, 133, 204, 355, 614, 696, 819] | 12              | n=8<br>median (range, IQR)<br>120.0 (60.0-312.0, 99.0-156.0)   | 0               | Not applicable        | 12              | n=8<br>median (range, IQR)<br>120.0 (60.0-312.0, 99.0-156.0)   |
| <b>Lymphoblastic lymphoma</b>      | 1<br>[626]                                      | 2               | n=2<br>161.0, 258.0                                            | 0               | Not applicable        | 2               | n=2<br>161.0, 258.0                                            |
| <b>Lymphoblastic lymphosarcoma</b> | 1<br>[376]                                      | 1               | Not reported                                                   | 0               | Not applicable        | 1               | Not reported                                                   |
| <b>Lymphoid malignancy</b>         | 1<br>[626]                                      | 24              | Not reported                                                   | 0               | Not applicable        | 24              | Not reported                                                   |



| Cause of death                                | Number of studies (references)                    | All cases       |                                                                | Variant cases   |                       | Classical cases |                                                                |
|-----------------------------------------------|---------------------------------------------------|-----------------|----------------------------------------------------------------|-----------------|-----------------------|-----------------|----------------------------------------------------------------|
|                                               |                                                   | Number of cases | Age of death (months)                                          | Number of cases | Age of death (months) | Number of cases | Age of death (months)                                          |
| <b>Lymphoreticular malignancy</b>             | 1<br>[287]                                        | 5               | n=5<br>median (range, IQR) 180.0<br>(108.0-504.0, 144.0-204.0) | 0               | Not applicable        | 5               | n=5<br>median (range, IQR)<br>180.0 (108.0-504.0; 144.0-204.0) |
| <b>Lymphosarcoma</b>                          | 1<br>[407]                                        | 1               | n=1<br>54.0                                                    | 0               | Not applicable        | 1               | n=1<br>54.0                                                    |
| <b>Malignant lymphoproliferative disorder</b> | 1<br>[669]                                        | 1               | n=1<br>384.0                                                   | 0               | Not applicable        | 1               | n=1<br>384.0                                                   |
| <b>Multiple gliovascular lesions</b>          | 1<br>[347]                                        | 1               | n=1<br>456.0                                                   | 0               | Not applicable        | 1               | n=1<br>456.0                                                   |
| <b>Neuroectodermal tumour of the brain</b>    | 1<br>[580]                                        | 2               | n=1<br>96.0                                                    | 0               | Not applicable        | 2               | n=1<br>96.0                                                    |
| <b>NHL</b>                                    | 8<br>[36, 373, 532, 614, 696, 789, 790, 874, 880] | 17              | n=4<br>24.0, 48.0, 72.0, 264.0                                 | 0               | Not applicable        | 17              | n=4<br>24.0, 48.0, 72.0, 264.0                                 |
| <b>NHL Large cell</b>                         | 1<br>[626]                                        | 11              | n=11<br>median (range, IQR)<br>219.0 (89.0-320.0, 153.0-287.0) | 0               | Not applicable        | 11              | n=11<br>median (range, IQR)<br>219.0 (89.0-320.0, 153.0-287.0) |

| Cause of death            | Number of studies<br>(references) | All cases       |                          | Variant cases   |                          | Classical cases |                           |
|---------------------------|-----------------------------------|-----------------|--------------------------|-----------------|--------------------------|-----------------|---------------------------|
|                           |                                   | Number of cases | Age of death<br>(months) | Number of cases | Age of death<br>(months) | Number of cases | Age of death<br>(months)  |
| Ovarian dysgerminoma      | 1<br>[312]                        | 1               | Not reported             | 0               | Not applicable           | 1               | Not reported              |
| Pancreatic adenocarcinoma | 1<br>[33]                         | 1               | n=1<br>600.0             | 1               | n=1<br>600.0             | 0               | Not applicable            |
| Pancreatic cancer         | 1<br>[35]                         | 1               | n=1<br>576.0             | 1               | n=1<br>576.0             | 0               | Not applicable            |
| Prostate cancer           | 2<br>[24, 498]                    | 2               | n=2<br>636.0, 648.0      | 0               | Not applicable           | 2               | n=2<br>636.0, 648.0       |
| Refractory lymphoma       | 1<br>[794]                        | 1               | Not reported             | 0               | Not applicable           | 1               | Not reported              |
| Sigmoid adenocarcinoma    | 1<br>[764]                        | 1               | n=1<br>96.0              | 0               | Not applicable           | 1               | n=1<br>198.0              |
| Small cell lymphosarcoma  | 1<br>[341]                        | 1               | Not reported             | 0               | Not applicable           | 1               | Not reported              |
| T-ALL                     | 3<br>[124, 614, 789]              | 3               | n=3<br>24.0 108.0, 144.0 | 0               | Not applicable           | 3               | n=2<br>24.0, 108.0, 144.0 |
| T-cell lymphoma           | 3<br>[24, 93, 696]                | 4               | n=1<br>108.0             | 0               | Not applicable           | 4               | n=1<br>108.0              |
| T-PLL                     | 1                                 | 1               | n=1                      | 0               | Not applicable           | 1               | n=1                       |

| Cause of death                       | Number of studies (references)                                                                                           | All cases       |                                                                 | Variant cases   |                                                               | Classical cases |                                                                 |
|--------------------------------------|--------------------------------------------------------------------------------------------------------------------------|-----------------|-----------------------------------------------------------------|-----------------|---------------------------------------------------------------|-----------------|-----------------------------------------------------------------|
|                                      |                                                                                                                          | Number of cases | Age of death (months)                                           | Number of cases | Age of death (months)                                         | Number of cases | Age of death (months)                                           |
|                                      | [79]                                                                                                                     |                 | 228.0                                                           |                 |                                                               |                 | 228.0                                                           |
| <b>Undefined pancreatic cancer</b>   | 1<br>[24]                                                                                                                | 1               | n=1<br>576.0                                                    | 1               | n=1<br>576.0                                                  | 0               | Not applicable                                                  |
| <b>Unspecified Leukaemia</b>         | 7<br>[36, 72, 76, 108, 142, 495, 696]                                                                                    | 7               | n=3<br>72.0, 123.0, 192.0                                       | 2               | n=2<br>564.0, 912.0                                           | 5               | n=3<br>72.0, 123.0, 192.0                                       |
| <b>Unspecified lymphoma</b>          | 12<br>[24, 90, 142, 250, 264, 294, 378, 382, 510, 810, 853, 854]                                                         | 18              | n=12<br>median (range, IQR) 120.0<br>(72.0-288.0, 117.0-162.0)  | 0               | Not applicable                                                | 18              | n=12<br>median (range, IQR) 120.0<br>(72.0-288.0, 117.0-162.0)  |
| <b>Unspecified malignancy</b>        | 24<br>[36, 43, 52, 61, 66, 76, 80, 201, 208, 211, 290, 337, 346, 370, 449, 490, 576, 716, 793, 810, 818, 866, 881, 885]} | 128             | n=11<br>median (range, IQR) 264.0<br>(45.0-612.0, 103.0-360.0)  | 4               | n=2<br>110.0, 612.0                                           | 124             | n=9<br>median (range, IQR)<br>264.0 (45.0-408.0; 96.0-312.0)    |
| <b>Widespread metastatic disease</b> | 1<br>[569]                                                                                                               | 1               | n=1<br>48.0                                                     | 0               | Not applicable                                                | 1               | n=1<br>48.0                                                     |
| <b>CANCER TOTAL</b>                  | N/A                                                                                                                      | 308             | n=125<br>median (range, IQR)<br>167.0 (24.0-912.0, 108.0-294.0) | 14              | n=14<br>median (range, IQR)<br>564.0 (110-612.0, 396.0-594.0) | 266             | n=101<br>median (range, IQR)<br>156.0 (24.0-840.0, 108.0-253.3) |

**Cardiac**

| Cause of death                  | Number of studies (references) | All cases       |                       | Variant cases   |                       | Classical cases |                       |
|---------------------------------|--------------------------------|-----------------|-----------------------|-----------------|-----------------------|-----------------|-----------------------|
|                                 |                                | Number of cases | Age of death (months) | Number of cases | Age of death (months) | Number of cases | Age of death (months) |
| <b>Congestive heart failure</b> | 1<br>[696]                     | 2               | Not reported          | 0               | Not applicable        | 2               | Not reported          |
| <b>Pulmonary hypertension</b>   | 1<br>[24]                      | 1               | n=1<br>48.0           | 0               | Not applicable        | 1               | n=1<br>48.0           |
| <b>Ventricular fibrillation</b> | 1<br>[354]                     | 1               | n=1<br>93.0           | 0               | Not applicable        | 1               | n=1<br>93.0           |
| <b>CARDIAC TOTAL</b>            | N/A                            | 4               | n=2<br>48.0, 93.0     | 0               | Not applicable        | 4               | n=2<br>48.0, 93.0     |

#### Gastrointestinal

|                                 |                      |   |                           |   |                |   |                           |
|---------------------------------|----------------------|---|---------------------------|---|----------------|---|---------------------------|
| <b>Decompensate d cirrhosis</b> | 1<br>[949]           | 1 | n=1<br>312.0              | 0 | Not applicable | 1 | n=1<br>312.0              |
| <b>Hepatic failure</b>          | 2<br>[160, 211, 457] | 3 | n=2<br>32.0, 144.0        | 0 | Not applicable | 3 | n=2<br>32.0, 144.0        |
| <b>GI TOTAL</b>                 | N/A                  | 3 | n=3<br>32.0, 144.0, 312.0 | 0 | Not applicable | 3 | n=3<br>32.0, 144.0, 312.0 |

#### Haematology (non-malignant)

|                                 |            |   |              |   |                |   |              |
|---------------------------------|------------|---|--------------|---|----------------|---|--------------|
| <b>Haemophagocytic syndrome</b> | 1<br>[532] | 1 | Not reported | 0 | Not applicable | 1 | Not reported |
| <b>HAEMATOLOGICAL TOTAL</b>     | N/A        | 1 | Not reported | 0 | Not applicable | 1 | Not reported |

| Cause of death                         | Number of studies (references)                                                            | All cases       |                                                                 | Variant cases   |                       | Classical cases |                                                                 |
|----------------------------------------|-------------------------------------------------------------------------------------------|-----------------|-----------------------------------------------------------------|-----------------|-----------------------|-----------------|-----------------------------------------------------------------|
|                                        |                                                                                           | Number of cases | Age of death (months)                                           | Number of cases | Age of death (months) | Number of cases | Age of death (months)                                           |
| <b>Infection (excluding pneumonia)</b> |                                                                                           |                 |                                                                 |                 |                       |                 |                                                                 |
| <b>Disseminated HSV</b>                | 1<br>[319]                                                                                | 1               | n=1<br>84.0                                                     | 0               | Not applicable        | 1               | n=1<br>84.0                                                     |
| <b>Measles</b>                         | 1<br>[407]                                                                                | 1               | n=1<br>42.0                                                     | 0               | Not applicable        | 1               | n=1<br>42.0                                                     |
| <b>Meningitis</b>                      | 1<br>[341]                                                                                | 1               | Not reported                                                    | 0               | Not applicable        | 1               | Not reported                                                    |
| <b>Pulmonary infection</b>             | 17<br>[78, 87, 114, 132, 139, 177, 201, 256, 345, 352, 432, 458, 532, 541, 614, 880, 953] | 67              | n=17<br>median (range, IQR)<br>132.0 (108.0-240.0, 120.0-192.0) | 0               | Not applicable        | 67              | n=11<br>median (range, IQR)<br>132.0 (108.0-240.0; 120.0-192.0) |
| <b>Systemic candidiasis</b>            | 1<br>[76]                                                                                 | 1               | Not reported                                                    | 0               | Not applicable        | 1               | Not reported                                                    |
| <b>TB</b>                              | 1<br>[407]                                                                                | 1               | n=1<br>132.0                                                    | 0               | Not applicable        | 1               | n=1<br>132.0                                                    |
| <b>Unspecified infection</b>           | 13<br>[76, 158, 317, 337, 346, 376, 387, 564, 624, 769, 790, 854, 881]                    | 59              | n=5<br>median (range, IQR)<br>153.6 (72.0-240.0, 82.6-192.0)    | 0               | Not applicable        | 59              | n=5<br>median (range, IQR)<br>153.6 (72.0-240.0; 82.6-192.0)    |
| <b>INFECTION TOTAL</b>                 | N/A                                                                                       | 129             | n=19                                                            | 0               | Not applicable        | 129             | n=19                                                            |

| Cause of death        | Number of studies (references) | All cases       |                                                        | Variant cases   |                       | Classical cases |                                                        |
|-----------------------|--------------------------------|-----------------|--------------------------------------------------------|-----------------|-----------------------|-----------------|--------------------------------------------------------|
|                       |                                | Number of cases | Age of death (months)                                  | Number of cases | Age of death (months) | Number of cases | Age of death (months)                                  |
| (excluding pneumonia) |                                |                 | median (range, IQR)<br>132.0 (42.0-240.0, 114.0-186.0) |                 |                       |                 | median (range, IQR)<br>132.0 (42.0-240.0; 114.0-186.0) |

### Malignancy related complications

|                                              |                           |           |                                           |          |                       |           |                                           |
|----------------------------------------------|---------------------------|-----------|-------------------------------------------|----------|-----------------------|-----------|-------------------------------------------|
| Consequences of lymphoproliferative disorder | 2<br>[452, 678]           | 2         | Not reported                              | 0        | Not applicable        | 2         | Not reported                              |
| Infectious complications during chemotherapy | 1<br>[855]                | 1         | Not reported                              | 0        | Not applicable        | 1         | Not reported                              |
| Pre-leukaemic syndrome                       | 1<br>[824]                | 1         | Not reported                              | 0        | Not applicable        | 1         | Not reported                              |
| Consequences of radiotherapy                 | 1<br>[578]                | 1         | Not reported                              | 0        | Not applicable        | 1         | Not reported                              |
| Toxicity                                     | 3<br>[337, 614, 789, 885] | 14        | n=3<br>120.0, 178.8, 300.0                | 0        | Not applicable        | 13        | n=2<br>120.0, 178.8, 300.0                |
| Complications of GI cancer                   | 1<br>[190]                | 1         | n=1<br>288.0                              | 0        | Not applicable        | 1         | n=1<br>288.0                              |
| <b>MALIG RELATED TOTAL</b>                   | <b>N/A</b>                | <b>19</b> | <b>n=4<br/>120.0, 178.8, 288.0, 300.0</b> | <b>0</b> | <b>Not applicable</b> | <b>19</b> | <b>n=4<br/>120.0, 178.8, 288.0, 300.0</b> |

| Cause of death                          | Number of studies<br>(references) | All cases          |                                              | Variant cases      |                          | Classical cases    |                                |
|-----------------------------------------|-----------------------------------|--------------------|----------------------------------------------|--------------------|--------------------------|--------------------|--------------------------------|
|                                         |                                   | Number<br>of cases | Age of death<br>(months)                     | Number<br>of cases | Age of death<br>(months) | Number<br>of cases | Age of death<br>(months)       |
| <b>Multi-organ failure</b>              |                                   |                    |                                              |                    |                          |                    |                                |
| <b>MULTI-ORGAN<br/>FAILURE</b>          | 5<br>[166, 220, 397, 815, 821]    | 7                  | n=4<br>90.0, 96.0 132.0, 144.0               | 0                  | Not applicable           | 7                  | n=4<br>90.0, 96.0 132.0, 144.0 |
| <b>Nutritional</b>                      |                                   |                    |                                              |                    |                          |                    |                                |
| <b>Cachexia</b>                         | 2<br>[36, 57]                     | 2                  | n=2<br>468.0, 720.0                          | 1                  | n=1<br>720.0             | 1                  | n=1<br>468.0                   |
| <b>Severe<br/>malnutrition</b>          | 1<br>[764]                        | 1                  | Not reported                                 | 0                  | Not applicable           | 1                  | Not reported                   |
| <b>Severe<br/>prostration</b>           | 1<br>[276]                        | 1                  | n=1<br>177.0                                 | 0                  | Not applicable           | 1                  | n=1<br>177.0                   |
| <b>Wasting</b>                          | 1<br>[391]                        | 1                  | n=1<br>240.0                                 | 0                  | Not applicable           | 1                  | n=1<br>240.0                   |
| <b>NUTRITION<br/>TOTAL</b>              | N/A                               | 5                  | n=4<br>median (range)<br>354.0 (177.0-720.0) | 1                  | n=1<br>720               | 4                  | n=3<br>354.0, 177.0, 720.0     |
| <b>Other causes</b>                     |                                   |                    |                                              |                    |                          |                    |                                |
| <b>EBV<br/>lymphoprolifera<br/>tion</b> | 1<br>[789]                        | 1                  | n=1<br>204.0                                 | 0                  | Not applicable           | 1                  | n=1<br>204.0                   |

| Cause of death               | Number of studies (references) | All cases       |                                   | Variant cases   |                       | Classical cases |                                   |
|------------------------------|--------------------------------|-----------------|-----------------------------------|-----------------|-----------------------|-----------------|-----------------------------------|
|                              |                                | Number of cases | Age of death (months)             | Number of cases | Age of death (months) | Number of cases | Age of death (months)             |
| <b>Lymphadogranematosi</b>   | 1<br>[76]                      | 1               | n=1<br>108.0                      | 0               | Not applicable        | 1               | n=1<br>108.0                      |
| <b>Haemophagocytosis</b>     | 1<br>[78]                      | 1               | Not reported                      | 0               | Not applicable        | 1               | Not reported                      |
| <b>Post-op complications</b> | 1<br>[483]                     | 1               | n=1<br>108.0                      | 0               | Not applicable        | 1               | n=1<br>108.0                      |
| <b>Bowel obstruction</b>     | 1<br>[789]                     | 1               | n=1<br>300.0                      | 0               | Not applicable        | 1               | n=1<br>300.0                      |
| <b>OTHER TOTAL</b>           | N/A                            | 5               | n=4<br>108.0, 108.0, 204.0, 300.0 | 0               | Not applicable        | 5               | n=4<br>108.0, 108.0, 204.0, 300.0 |

### Pneumonia

|                             |                                                                                                                                                                                          |    |                                                                |   |                |    |                                                                |
|-----------------------------|------------------------------------------------------------------------------------------------------------------------------------------------------------------------------------------|----|----------------------------------------------------------------|---|----------------|----|----------------------------------------------------------------|
| <b>Aspiration pneumonia</b> | 2<br>[278, 696]                                                                                                                                                                          | 3  | n=1<br>300.0                                                   | 0 | Not applicable | 3  | n=1<br>300.0                                                   |
| <b>Other Pneumonia</b>      | 37<br>[49, 76, 99, 108, 121, 128, 134, 142, 221, 242, 278, 294, 296, 341, 347, 358, 382, 385, 431, 438, 442, 445, 458, 513, 572, 648, 657, 693, 696, 719, 771, 782, 789, 821, 853, 951]] | 62 | n=33<br>median (range, IQR)<br>168.0 (15.0-564.0, 120.0-300.0) | 1 | n=1<br>396.0   | 50 | n=34<br>median (range, IQR)<br>162.0 (15.0-564.0, 120.0-300.0) |



| Cause of death         | Number of studies (references) | All cases       |                                                                | Variant cases   |                       | Classical cases |                                                                |
|------------------------|--------------------------------|-----------------|----------------------------------------------------------------|-----------------|-----------------------|-----------------|----------------------------------------------------------------|
|                        |                                | Number of cases | Age of death (months)                                          | Number of cases | Age of death (months) | Number of cases | Age of death (months)                                          |
| <b>PNEUMONIA TOTAL</b> | N/A                            | 54              | n=31<br>median (range, IQR)<br>177.0 (15.0-564.0, 123.0-300.0) | 1               | 396.0                 | 53              | n=30<br>median (range, IQR)<br>168.0 (15.0-564.0; 120.0-300.0) |

#### Renal

|                            |            |   |              |   |                |   |              |
|----------------------------|------------|---|--------------|---|----------------|---|--------------|
| <b>Acute renal failure</b> | 1<br>[842] | 1 | Not reported | 0 | Not applicable | 1 | Not reported |
| <b>Renal failure</b>       | 1<br>[818] | 1 | n=1<br>97.2  | 0 | Not applicable | 1 | n=1<br>97.2  |
| <b>RENAL TOTAL</b>         | N/A        | 2 | n=1<br>97.2  | 0 | Not applicable | 2 | n=1<br>97.2  |

#### Respiratory failure

|                            |                                                                                                                                                                                       |    |                                                                 |   |              |    |                                                                 |
|----------------------------|---------------------------------------------------------------------------------------------------------------------------------------------------------------------------------------|----|-----------------------------------------------------------------|---|--------------|----|-----------------------------------------------------------------|
| <b>RESPIRATORY FAILURE</b> | 32<br>[24, 36, 49, 52, 128, 131, 134, 139, 142, 204, 211, 221, 225, 240, 294, 302, 305, 347, 358, 464, 495, 498, 513, 572, 614, 693, 696, 717, 730, 774, 789, 834, 853, 864, 950-952] | 92 | n=49<br>median (range, IQR) 216.0<br>(108.0-600.0, 144.0-300.0) | 0 | Not reported | 92 | n=49<br>median (range, IQR) 216.0<br>(108.0-600.0, 144.0-300.0) |
|----------------------------|---------------------------------------------------------------------------------------------------------------------------------------------------------------------------------------|----|-----------------------------------------------------------------|---|--------------|----|-----------------------------------------------------------------|

#### Other respiratory causes

|                              |   |   |     |   |                |   |     |
|------------------------------|---|---|-----|---|----------------|---|-----|
| <b>Acute saturation drop</b> | 1 | 1 | n=1 | 0 | Not applicable | 1 | n=1 |
|------------------------------|---|---|-----|---|----------------|---|-----|

| Cause of death                           | Number of studies<br>(references) | All cases          |                          | Variant cases      |                          | Classical cases    |                          |
|------------------------------------------|-----------------------------------|--------------------|--------------------------|--------------------|--------------------------|--------------------|--------------------------|
|                                          |                                   | Number<br>of cases | Age of death<br>(months) | Number<br>of cases | Age of death<br>(months) | Number<br>of cases | Age of death<br>(months) |
|                                          | [763]                             |                    | 156.0                    |                    |                          |                    | 156.0                    |
| <b>ARDS</b>                              | 1<br>[513]                        | 1                  | Not reported             | 0                  | Not applicable           | 1                  | Not reported             |
| <b>Bronchiectasis</b>                    | 1<br>[211]                        | 7                  | Not reported             | 0                  | Not applicable           | 7                  | Not reported             |
| <b>Bronchitis</b>                        | 1<br>[242]                        | 1                  | n=1<br>168.0             | 0                  | Not applicable           | 1                  | n=1<br>168.0             |
| <b>Chronic lung<br/>disease</b>          | 2<br>[87, 614]                    | 5                  | Not reported             | 0                  | Not applicable           | 5                  | Not reported             |
| <b>Chronic<br/>pulmonary<br/>disease</b> | 1<br>[75]                         | 1                  | n=1<br>84.0              | 0                  | Not applicable           | 1                  | n=1<br>84.0              |
| <b>Interstitial lung<br/>disease</b>     | 1<br>[789]                        | 2                  | n=2<br>120.0, 216.0      | 0                  | Not applicable           | 2                  | n=2<br>120.0, 216.0      |
| <b>Pleural effusion</b>                  | 1<br>[290]                        | 1                  | n=1<br>408.0             | 0                  | Not applicable           | 1                  | n=1<br>408.0             |
| <b>Pneumocystis</b>                      | 1<br>[818]                        | 1                  | Not reported             | 0                  | Not applicable           | 1                  | Not reported             |
| <b>Pneumonitis</b>                       | 1<br>[513]                        | 1                  | Not reported             | 0                  | Not applicable           | 1                  | Not reported             |

| Cause of death                       | Number of studies (references) | All cases       |                                                                | Variant cases   |                       | Classical cases |                                                                |
|--------------------------------------|--------------------------------|-----------------|----------------------------------------------------------------|-----------------|-----------------------|-----------------|----------------------------------------------------------------|
|                                      |                                | Number of cases | Age of death (months)                                          | Number of cases | Age of death (months) | Number of cases | Age of death (months)                                          |
| <b>Pneumothorax</b>                  | 2<br>[345, 696]                | 3               | n=1<br>132.0                                                   | 0               | Not applicable        | 3               | n=1<br>132.0                                                   |
| <b>Pulmonary complications</b>       | 3<br>[427, 510, 615]           | 15              | n=1<br>180.0                                                   | 0               | Not applicable        | 15              | n=1<br>180.0                                                   |
| <b>Pulmonary fibrosis</b>            | 1<br>[310]                     | 1               | n=1<br>213.0                                                   | 0               | Not applicable        | 1               | n=1<br>213.0                                                   |
| <b>Respiratory deterioration</b>     | 1<br>[255]                     | 3               | n=3<br>96.0, 96.0, 108.0                                       | 0               | Not applicable        | 3               | n=3<br>96.0, 96.0, 108.0                                       |
| <b>Unspecified respiratory cause</b> | 3<br>[696, 874, 881]           | 8               | Not reported                                                   | 0               | Not applicable        | 8               | Not reported                                                   |
| <b>RESPIRATORY OTHER TOTAL</b>       | N/A                            | 51              | n=12<br>median (range, IQR)<br>144.0 (84.0-408.0, 105.0-188.3) | 0               | Not applicable        | 51              | n=12<br>median (range, IQR)<br>144.0 (84.0-408.0, 105.0-188.3) |

### Sepsis

|               |                                                                                 |    |                                                               |   |                |    |                                                               |
|---------------|---------------------------------------------------------------------------------|----|---------------------------------------------------------------|---|----------------|----|---------------------------------------------------------------|
| <b>SEPSIS</b> | 15<br>[76, 78, 121, 155, 240, 278, 310, 410, 449, 571, 603, 614, 789, 818, 842] | 18 | n=8<br>median (range, IQR)<br>208.5 (60.0-312.0, 180.0-237.0) | 0 | Not applicable | 18 | n=8<br>median (range, IQR)<br>208.5 (60.0-312.0; 180.0-237.0) |
|---------------|---------------------------------------------------------------------------------|----|---------------------------------------------------------------|---|----------------|----|---------------------------------------------------------------|

### Unknown cause

| Cause of death | Number of studies (references)                                                                                                                                                                                                                                                                                                                                                   | All cases       |                                                                               | Variant cases   |                                | Classical cases |                                                                               |
|----------------|----------------------------------------------------------------------------------------------------------------------------------------------------------------------------------------------------------------------------------------------------------------------------------------------------------------------------------------------------------------------------------|-----------------|-------------------------------------------------------------------------------|-----------------|--------------------------------|-----------------|-------------------------------------------------------------------------------|
|                |                                                                                                                                                                                                                                                                                                                                                                                  | Number of cases | Age of death (months)                                                         | Number of cases | Age of death (months)          | Number of cases | Age of death (months)                                                         |
| <b>UNKNOWN</b> | <p>86</p> <p>[24, 36, 61, 62, 70, 75, 76, 78, 88, 90, 127, 130, 139, 154, 156, 162-164, 175, 176, 187, 205, 231, 270, 275, 298, 304, 327, 337, 346, 350, 364, 374, 394, 400, 401, 407-409, 424, 434, 449, 473, 489, 565, 568, 577, 610, 615, 626, 638, 660, 676, 681, 686, 694, 735, 758, 764, 788-792, 794, 822, 825, 833, 844, 858, 865, 866, 882, 884, 888, 890, 954-963]</p> | 1021            | <p>n=40</p> <p>median (range, IQR)</p> <p>192.0 (24.0-612.0, 130.5-294.0)</p> | 2               | <p>n=2</p> <p>492.0, 612.0</p> | 1019            | <p>n=38</p> <p>median (range, IQR)</p> <p>186.0 (24.0-552.0; 129.5-279.0)</p> |

## S7 – Quality assessment Case-control studies

| Title                                                                                                                                               | Author                        | Type of article           | Case definition adequate | Representative of the cases | Selection of controls | Definition of controls | Comparability | Ascertainment of exposure | Same method for cases and controls | Non-response rate | Quality |
|-----------------------------------------------------------------------------------------------------------------------------------------------------|-------------------------------|---------------------------|--------------------------|-----------------------------|-----------------------|------------------------|---------------|---------------------------|------------------------------------|-------------------|---------|
| Altered corticomotor-cerebellar integrity in young ataxia telangiectasia patients                                                                   | I. Sahama et al               | Full text                 | A*                       | A*                          | C                     | A*                     | A*            | A*                        | A*                                 | A*                | 7       |
| Antibody deficiency in patients with ataxia telangiectasia is caused by disturbed B- and T-cell homeostasis and reduced immune repertoire diversity | G. J. Driessen et al          | Full text                 | A*                       | A*                          | C                     | A*                     | A,B **        | A*                        | A*                                 | A*                | 8       |
| Antibody response to a seven-valent pneumococcal conjugated vaccine in patients with ataxia-telangiectasia                                          | O. Sanal et al                | Full text                 | A*                       | A*                          | A*                    | A*                     | A,B **        | A*                        | A*                                 | A*                | 9       |
| Antibody responses in vivo in chromosome instability syndromes with immunodeficiency                                                                | C. M. Weemaes et al           | Full text                 | C                        | B                           | C                     | A*                     | None          | A*                        | A*                                 | A*                | 4       |
| Ataxia Telangiectasia (AT) as a radiation sensitivity syndrom and limits of radiotherapeutic intervention                                           | F. T. Hoche et al             | Full text (conf abstract) | A*                       | A*                          | A*                    | A*                     | None          | A*                        | A*                                 | A*                | 7       |
| Audiological findings in children with ataxia-telangiectasia (A-T) syndrome                                                                         | P. O. Afifi, H. H. Elsanadiky | Full text                 | A*                       | B                           | A*                    | A*                     | None          | A*                        | A*                                 | A*                | 6       |
| Autonomic dysfunction in patients with Ataxia-Telangiectasia                                                                                        | L. Tubani et al               | Full text                 | A*                       | B                           | A*                    | A*                     | A,B **        | A*                        | A*                                 | A*                | 8       |
| Blood metal levels and related antioxidant enzyme activities in patients with ataxia telangiectasia                                                 | S. Squadrone et al            | Full text                 | A*                       | A*                          | A*                    | A*                     | A,B **        | A*                        | A*                                 | A*                | 9       |

| Title                                                                                                                                                 | Author                   | Type of article           | Case definition adequate | Representative of the cases | Selection of controls | Definition of controls | Comparability | Ascertainment of exposure | Same method for cases and controls | Non-response rate | Quality |
|-------------------------------------------------------------------------------------------------------------------------------------------------------|--------------------------|---------------------------|--------------------------|-----------------------------|-----------------------|------------------------|---------------|---------------------------|------------------------------------|-------------------|---------|
| Body composition, muscle strength and hormonal status in patients with ataxia telangiectasia: a cohort study                                          | H. Pommerening et al     | Full text                 | A*                       | A*                          | A*                    | A*                     | A,B **        | A*                        | A*                                 | A*                | 9       |
| Brain glucose metabolism in adults with ataxia-telangiectasia and their asymptomatic relatives                                                        | N. D. Volkow et al       | Full text                 | A*                       | A*                          | A*                    | A*                     | A,B **        | A*                        | A*                                 | A*                | 9       |
| Cerebral glutathione is unchanged in children with AT: Preliminary results from the children ataxia teleangiectasia neuro assessment project (CATNAP) | F. Raschke et al         | Full text (conf abstract) | B                        | B                           | C                     | A*                     | None          | A*                        | A*                                 | A*                | 4       |
| Classical ataxia telangiectasia patients have a congenitally aged immune system with high expression of CD95                                          | E. F. Carney et al       | Full text                 | A*                       | A*                          | A*                    | A*                     | A*            | A*                        | A*                                 | A*                | 8       |
| Cognitive phenotype in ataxia-telangiectasia                                                                                                          | F. Hoche et al           | Full text                 | A*                       | A*                          | A*                    | A*                     | A,B **        | B                         | A*                                 | A*                | 8       |
| Conditioning in identical twins with ataxia-telangiectasia                                                                                            | S. H. Mostofsky et al    | Full text                 | A*                       | A*                          | A*                    | A*                     | A*            | A*                        | A*                                 | A*                | 8       |
| Coordination between respiration and deglutition in children with Ataxia-Telangiectasia (A-T)                                                         | M. A. Lefton-Greif et al | Full text                 | A*                       | A*                          | C                     | B                      | A*            | A*                        | A*                                 | A*                | 6       |
| Decreased cytoplasmic immunoglobulin A production during Epstein-Barr virus immortalization on lymphocytes from patients with ataxia-telangiectasia   | M. Okano et al           | Full text                 | A*                       | B                           | C                     | A*                     | A,B **        | A*                        | A*                                 | A*                | 7       |
| Defective pneumococcal antibody response in patients with recurrent respiratory tract infections                                                      | B. Erman et al           | Full text                 | A*                       | A*                          | B                     | A*                     | A*            | A*                        | A*                                 | A*                | 7       |
| Deficiencies in CD4+ and CD8+ T cell subsets in ataxia telangiectasia                                                                                 | R. R. Schubert et al     | Full text                 | A*                       | A*                          | C                     | A*                     | A             | A*                        | A*                                 | A*                | 6       |

| Title                                                                                                                                                  | Author                     | Type of article           | Case definition adequate | Representative of the cases | Selection of controls | Definition of controls | Comparability | Ascertainment of exposure | Same method for cases and controls | Non-response rate | Quality |
|--------------------------------------------------------------------------------------------------------------------------------------------------------|----------------------------|---------------------------|--------------------------|-----------------------------|-----------------------|------------------------|---------------|---------------------------|------------------------------------|-------------------|---------|
| Disorders of B cells and helper T cells in the pathogenesis of the immunoglobulin deficiency of patients with ataxia telangiectasia                    | T. A. Waldmann et al       | Full text                 | A*                       | B                           | C                     | B                      | None          | A*                        | B                                  | A*                | 3       |
| Disorders of Upper Limb Movements in Ataxia-Telangiectasia                                                                                             | A. G. Shaikh et al         | Full text                 | A*                       | A*                          | A*                    | A*                     | None          | A*, C                     | A*                                 | A*                | 7       |
| Dyslipidemia and reduced antioxidant vitamins in ataxia telangiectasia patients                                                                        | I. G. A. Andrade et al     | Full text (conf abstract) | B                        | B                           | C                     | A*                     | None          | A*                        | A*                                 | A*                | 4       |
| Early diagnosis of ataxia-atelangiectasia using radiosensitivity testing                                                                               | X. Sun et al               | Full text                 | A*                       | A*                          | C                     | B                      | None          | A                         | A*                                 | A*                | 4       |
| Effect of thymic humoral factor on cellular immune factors of normal children and of pediatric patients with ataxia telangiectasia and Down's syndrome | Z. T. Handzel et al        | Full text                 | A*                       | B                           | B                     | A*                     | A*            | A*                        | A*                                 | A*                | 6       |
| Elevated serum IL-8 levels in ataxia telangiectasia                                                                                                    | S. A. McGrath-Morrow et al | Full text                 | A*                       | A*                          | B                     | A*                     | None          | A*                        | A*                                 | A*                | 6       |
| Epstein-Barr virus (EBV)-specific cell-mediated and humoral immune responses in ataxia-telangiectasia patients                                         | G. Masucci et al           | Abstract                  | A*                       | A*                          | A*                    | A*                     | None          | A*                        | U/K                                | U/K               | 5       |
| Epstein-Barr virus antibodies in patients with ataxia-telangiectasia and other immunodeficiency diseases                                               | J. H. Joncas et al         | Full text                 | A*                       | B                           | C                     | A*                     | None          | A*                        | A*                                 | A*                | 5       |
| Epstein-Barr virus-related antibody patterns in ataxia-telangiectasia                                                                                  | A. I. Berkel et al         | Full text                 | B                        | B                           | A*                    | A*                     | A*            | A*                        | A*                                 | A*                | 6       |
| Evidence that defective gamma interferon production in patients with primary immunodeficiencies is due to intrinsic incompetence of lymphocytes        | R. Paganelli et al         | Full text                 | B                        | B                           | C                     | A*                     | A*            | A*                        | A*                                 | A*                | 5       |

| Title                                                                                                                           | Author                  | Type of article           | Case definition adequate | Representative of the cases | Selection of controls | Definition of controls | Comparability | Ascertainment of exposure | Same method for cases and controls | Non-response rate | Quality |
|---------------------------------------------------------------------------------------------------------------------------------|-------------------------|---------------------------|--------------------------|-----------------------------|-----------------------|------------------------|---------------|---------------------------|------------------------------------|-------------------|---------|
| Expression of CD40, CD40L and IgM production in patients with ataxiatelangiectasia                                              | C. T. M. Pereira et al  | Full text (conf abstract) | B                        | A*                          | C                     | A*                     | A*            | A*                        | A*                                 | A*                | 6       |
| Flow cytometry as an important tool in the diagnosis of immunodeficiencies demonstrated in a patient with ataxia-telangiectasia | A. B. Stefano et al     | Abstract                  | A*                       | A*                          | A*                    | A*                     | None          | A*                        | A*                                 | A*                | 7       |
| Growth and nutrition in children with ataxia telangiectasia                                                                     | E. Stewart et al        | Full text                 | A*                       | A*                          | C                     | A*                     | A*            | A*                        | A*                                 | A*                | 7       |
| Growth hormone deficiency and immune status in patients with ataxia telangiectasia                                              | S. Vos et al            | Full text (conf abstract) | A*                       | A*                          | C                     | A*                     | A,B **        | A*                        | A*                                 | A*                | 8       |
| Growth retardation and growth hormone deficiency in patients with Ataxia telangiectasia                                         | S. Voss et al           | Abstract                  | A*                       | U/K                         | U/K                   | A*                     | U/K           | A*                        | A*                                 | U/K               | 4       |
| H2AX gene does not have a modifier effect on ataxia-telangiectasia phenotype                                                    | L. O. Mesci et al       | Full text                 | A*                       | A*                          | C                     | A*                     | A,B **        | A*                        | B                                  | A*                | 7       |
| Health-related quality of life in primary immune deficient patients                                                             | H. Mozaffari et al      | Full text                 | B                        | B                           | A*                    | A*                     | A*            | C, D                      | A*                                 | A*                | 5       |
| Heterotopic Purkinje cells in ataxia-telangiectasia                                                                             | A. R. Bottini et al     | Full text                 | A*                       | A*                          | B                     | A*                     | A,B **        | A*                        | A*                                 | A*                | 8       |
| Histocompatibility (HLA) factors in ataxia telangiectasia                                                                       | A. I. Berkel, F. Ersoy  | Full text                 | U/K                      | U/K                         | A*                    | A*                     | None          | A*                        | A*                                 | U/K               | 4       |
| Immunoglobulin Content of Intestinal Plasma Cells in Ataxia Telangiectasia                                                      | S. Eidelman, S.D. Davis | Full text                 | B                        | B                           | C                     | A*                     | A*            | A*                        | A*                                 | A*                | 5       |
| Immunoglobulin metabolism in ataxia telangiectasia                                                                              | W. Strober et al        | Full text                 | A*                       | A*                          | A*                    | A*                     | None          | A*                        | A*                                 | A*                | 7       |



| Title                                                                                                                                                        | Author                   | Type of article           | Case definition adequate | Representative of the cases | Selection of controls | Definition of controls | Comparability | Ascertainment of exposure | Same method for cases and controls | Non-response rate | Quality |
|--------------------------------------------------------------------------------------------------------------------------------------------------------------|--------------------------|---------------------------|--------------------------|-----------------------------|-----------------------|------------------------|---------------|---------------------------|------------------------------------|-------------------|---------|
| Impaired interferon-gamma production in response to live bacteria and Toll-like receptor agonists in patients with ataxia telangiectasia                     | J. S. Reichenbach et al  | Full text                 | B                        | B                           | A*                    | A*                     | A*            | A*                        | A*                                 | A*                | 6       |
| Judgment of duration in individuals with ataxia-telangiectasia                                                                                               | S. H. Mostofsky et al    | Full text                 | A*                       | A*                          | C                     | A*                     | A*            | A*                        | A*                                 | A*                | 7       |
| Letter: A.F.P. and ataxia-telangiectasia                                                                                                                     | M. J. H. Simons et al    | Full text                 | A*                       | B                           | C                     | A*                     | None          | A*                        | A*                                 | A*                | 5       |
| Motor pathway degeneration in young ataxia telangiectasia patients: A diffusion tractography study                                                           | I. Sahama et al          | Full text                 | A*                       | A*                          | C                     | A*                     | A*            | A*                        | A*                                 | A*                | 7       |
| Multimodal electrophysiological assessment of ataxia telangiectasia                                                                                          | M. J. Taylor, W.J. Logan | Full text                 | B                        | B                           | C                     | A*                     | A*            | A*                        | A*                                 | A*                | 5       |
| Novel homozygous ataxia-telangiectasia (A-T) mutated gene mutation identified in a Chinese pedigree with A-T                                                 | W.C. Chen et al          | Full text                 | A*                       | A*                          | A*                    | A*                     | None          | A*                        | A*                                 | A*                | 7       |
| Nutritional Status, Plasma Levels of Retinol and Beta-Carotene and Oxidative Stress in Ataxia-Telangiectasia Patients                                        | R. Silva et al           | Full text (conf abstract) | A*                       | A*                          | A*                    | A*                     | A*B*          | A*                        | A*                                 | A*                | 9       |
| Physiological effects of pioglitazone and metformin in patients with ataxia-telangiectasia                                                                   | L.J. McCreight et al     | Abstract and Poster       | A*                       | A*                          | A*                    | A*                     | A*            | A*                        | A*                                 | A*                | 8       |
| Premature ageing of the immune system underlies immunodeficiency in ataxia telangiectasia                                                                    | A. R. B. Exley et al     | Full text                 | A*                       | A*                          | C                     | A*                     | None          | A*                        | A*                                 | A*                | 6       |
| Proteomic characterization of cerebrospinal fluid from ataxia-telangiectasia (A-T) patients using a LC/MS-based label-free protein quantification technology | M. Dzieciatkowska et al  | Full text                 | A*                       | B                           | B                     | A*                     | None          | A*                        | A*                                 | A*                | 5       |

| Title                                                                                                   | Author                         | Type of article           | Case definition adequate | Representative of the cases | Selection of controls | Definition of controls | Comparability | Ascertainment of exposure | Same method for cases and controls | Non-response rate | Quality |
|---------------------------------------------------------------------------------------------------------|--------------------------------|---------------------------|--------------------------|-----------------------------|-----------------------|------------------------|---------------|---------------------------|------------------------------------|-------------------|---------|
| Proton MR spectroscopic imaging in ataxia-telangiectasia                                                | D. D. Lin et al                | Abstract                  | A*                       | B                           | C                     | A*                     | A*            | A*                        | A*                                 | A*                | 6       |
| Proton spectroscopy and imaging at 3T in ataxia-telangiectasia                                          | L. I. Wallis et al             | Full text                 | A*                       | A*                          | A*                    | A*                     | A*            | A*                        | A*                                 | A*                | 8       |
| Quantitative evaluation of brain involvement in ataxia telangiectasia by diffusion weighted MR imaging  | A. K. Firat et al              | Full text                 | A*                       | A*                          | A*                    | A*                     | None          | A*                        | A*                                 | A*                | 7       |
| Risk of Atherosclerosis and Diabetes in Patients with Ataxia Telangiectasia                             | T. L. Paulino et al            | Full text (conf abstract) | A*                       | A*                          | C                     | A*                     | A,B **        | A*                        | A*                                 | A*                | 8       |
| Screening test for ataxia telangiectasia                                                                | D. Schindler et al             | Full text                 | A*                       | B                           | C                     | A*                     | A*            | A*                        | A*                                 | A*                | 6       |
| Serum IgD concentrations in patients with ataxia telangiectasia and with selective IgA deficiency       | O. Sanal et al                 | Full text                 | B                        | A*                          | B                     | A*                     | A*            | A*                        | A*                                 | A*                | 6       |
| Susceptibility to infections in patients with ataxia-telangiectasia (AT): A prospective follow-up study | S. Zielen et al                | Full text (conf abstract) | B                        | A*                          | C                     | B                      | A*            | A*, C                     | A*                                 | A*                | 5       |
| The Objective Assessment of Abnormal Eye-Movements in Infants and Young-Children                        | M. H. Jacobs et al             | Full text                 | A*                       | B                           | A*                    | A*                     | None          | A*, C                     | A*                                 | A*                | 6       |
| Transitional B cells and CD21low in patients with ataxia-telangiectasia                                 | D. C. P. Bichuetti-Silva et al | Full text (conf abstract) | B                        | B                           | C                     | B                      | A*            | A*                        | A*                                 | A*                | 4       |
| Unusual prevalence of Epstein-Barr virus early antigen (EBV-EA) antibodies in ataxia telangiectasia     | J. L. Joncas et al             | Full text                 | A*                       | A*                          | C                     | A*                     | A*            | A*                        | A*                                 | A*                | 7       |

| Title                                                                                                                                                                                              | Author                                    | Type of article | Case definition adequate | Representative of the cases | Selection of controls | Definition of controls | Comparability | Ascertainment of exposure | Same method for cases and controls | Non-response rate | Quality |
|----------------------------------------------------------------------------------------------------------------------------------------------------------------------------------------------------|-------------------------------------------|-----------------|--------------------------|-----------------------------|-----------------------|------------------------|---------------|---------------------------|------------------------------------|-------------------|---------|
| Variant ataxia-telangiectasia presenting as primary-appearing dystonia in Canadian Mennonites.[Erratum appears in Neurology. 2012 Mar 27;78(13):1029 Note: Nakamura, T [corrected to Nakamura, K]] | R. Saunders-Pullman et al                 | Full text       | A*                       | A*                          | A*                    | A*                     | A,B **        | A,B **                    | A*                                 | A*                | 10      |
| Vitamin E serum levels are normal in ataxia telangiectasia (Louis-Bar disease)                                                                                                                     | C. Battisti et al                         | Full text       | A*                       | A*                          | C                     | A*                     | A,B **        | A*                        | A*                                 | A*                | 8       |
| DNA methylation and gene expression signatures are associated with ataxia-telangiectasia phenotype                                                                                                 | McGrath-Morrow SA et al                   | Full text       | A*                       | A*                          | A*                    | A*                     | A,B **        | A*, C                     | A*                                 | A*                | 9       |
| Multiparametric cerebellar imaging and clinical phenotype in childhood ataxia telangiectasia                                                                                                       | Dineen RA et al                           | Full text       | A*                       | A*                          | A*                    | A*                     | A,B **        | A*                        | A*                                 | <b>B</b>          | 8       |
| Selenium levels and glutathione peroxidase activity in patients with ataxia-telangiectasia: association with oxidative stress and lipid status biomarkers                                          | Andrade IGA et al                         | Full text       | A*                       | A*                          | <b>B</b>              | A*                     | A*            | A*, C                     | A*                                 | A*                | 7       |
| Free-Living Motor Activity Monitoring in Ataxia-Telangiectasia                                                                                                                                     | Khan, NC; Pandey, V; Gajos, KZ; Gupta, AS | Full text       | A*                       | B                           | C                     | A*                     | None          | A*                        | A*                                 | A*                | 5       |
| Altered Cerebrospinal Fluid (CSF) in Children with Ataxia Telangiectasia                                                                                                                           | Woelke, S et al                           | Full text       | A*                       | B                           | <b>B</b>              | A*                     | None          | A*                        | A*                                 | A*                | 5       |
| Normal Numbers of Stem Cell Memory T Cells Despite Strongly Reduced Naive T Cells Support                                                                                                          | Weitering, TJ et al                       | Full text       | A*                       | A*                          | C                     | A*                     | A*            | A*, C                     | A*                                 | A*                | 7       |

| Title                                                                                                                         | Author                     | Type of article | Case definition adequate | Representative of the cases | Selection of controls | Definition of controls | Comparability | Ascertainment of exposure | Same method for cases and controls | Non-response rate | Quality |
|-------------------------------------------------------------------------------------------------------------------------------|----------------------------|-----------------|--------------------------|-----------------------------|-----------------------|------------------------|---------------|---------------------------|------------------------------------|-------------------|---------|
| Intact Memory T Cell Compartment in Ataxia Telangiectasia                                                                     |                            |                 |                          |                             |                       |                        |               |                           |                                    |                   |         |
| Analysis of chromosomal aberrations and $\gamma$ H2A.X foci to identify radiation-sensitive ataxia-telangiectasia patients    | Bucher M et al             | Full text       | A*                       | A*                          | <b>B</b>              | A*                     | A,B<br>**     | A*, C                     | A*                                 | A*                | 8       |
| Immune competence and respiratory symptoms in patients with ataxia telangiectasia: A prospective follow-up study              | Wölke S et al              | Abstract        | N/A                      | N/A                         | N/A                   | N/A                    | N/A           | N/A                       | N/A                                | N/A               | N/A     |
| Variable Abnormalities in T and B Cell Subsets in Ataxia Telangiectasia                                                       | Shad, TM et al             | Full text       | A*                       | B                           | C                     | A*                     | A,B<br>**     | A*                        | A*                                 | A*                | 7       |
| Agreement of cardiovascular risk in ataxia-telangiectasia mutated heterozygotes and their children with Ataxia-telangiectasia | Barreto, TLN et al         | Full text       | A*                       | A*                          | A*                    | A*                     | A,B<br>**     | A*, C                     | A*                                 | A*                | 9       |
| The Role of Respiratory Viruses in Children with Ataxia-Telangiectasia                                                        | Mendez-Echevarria, A et al | Full text       | A*                       | A*                          | A*                    | A*                     | A,B<br>**     | A*                        | A*                                 | <b>B</b>          | 8       |
| U/K – unknown, N/A – not applicable                                                                                           |                            |                 |                          |                             |                       |                        |               |                           |                                    |                   |         |

## S8 – Quality assessment Cohort studies

| Title                                                                                                   | Author                                    | Type of article | Representativeness of the exposed cohort | Selection of the non-exposed cohort | Ascertainment of exposure | Demonstration of interest not present at start of study | Comparability | Assessment of outcome | Was follow-up long enough? | Adequacy of follow-up   | Stars | Quality (all) | Quality (comparability removed) |
|---------------------------------------------------------------------------------------------------------|-------------------------------------------|-----------------|------------------------------------------|-------------------------------------|---------------------------|---------------------------------------------------------|---------------|-----------------------|----------------------------|-------------------------|-------|---------------|---------------------------------|
| Cough ability measurements and recurrent respiratory symptoms in individuals with Ataxia Telangiectasia | D. Vilozni et al                          | Abstract only   | A                                        | unknown                             | A                         | B                                                       | A             | B                     | Unknown - abstract only    | Unknown - abstract only | 4     | Poor          | Poor                            |
| FVC deterioration, airway obstruction determination, and life span in Ataxia telangiectasia             | D. Vilozni et al                          | Full text       | A                                        | Unknown                             | A                         | B                                                       | A             | B                     | A                          | A                       | 6     | Fair          | Fair                            |
| Neuroimaging Findings and Repeat Neuroimaging Value in Pediatric Chronic Ataxia                         | M. S. Salman, Chodirker, B. N., Bunge, M. | Full text       | A                                        | Unknown                             | A                         | B                                                       | A             | B                     | Unable to determine        | A                       | 5     | Fair          | Fair                            |
| Alpha fetoprotein is increasing with age in ataxia-telangiectasia                                       | A. Stray-Pedersen et al                   | Full text       | A                                        | N/A                                 | A                         | A                                                       | N/A           | B                     | A                          | A                       | 6     | Poor          | Good                            |

| Title                                                                                                     | Author                      | Type of article | Representativeness of the exposed cohort | Selection of the non-exposed cohort | Ascertainment of exposure | Demonstration of interest not present at start of study | Comparability | Assessment of outcome | Was follow-up long enough? | Adequacy of follow-up | Stars | Quality (all) | Quality (comparability removed) |
|-----------------------------------------------------------------------------------------------------------|-----------------------------|-----------------|------------------------------------------|-------------------------------------|---------------------------|---------------------------------------------------------|---------------|-----------------------|----------------------------|-----------------------|-------|---------------|---------------------------------|
| Alpha Fetoprotein Levels in Ataxia Telangiectasia as Related to Age, Disease Characteristics and Outcomes | Agress, A et al             | Abstract only   | A                                        | N/A                                 | A                         | B                                                       | N/A           | B                     | Unknown - abstract only    | A                     | 4     | Poor          | Fair                            |
| Ataxia telangiectasia in Turkey: multisystem involvement of 91 patients                                   | H. Akturk et al             | Full text       | A                                        | N/A                                 | A                         | B                                                       | N/A           | B                     | A                          | A                     | 5     | Poor          | Fair                            |
| Ataxia-Telangiectasia Clinical and Laboratory Features: Single Center Results                             | A. S. Sasihuseyinoglu et al | Abstract only   | A                                        | N/A                                 | A                         | B                                                       | N/A           | B                     | A                          | A                     | 5     | Poor          | Fair                            |
| Ataxia-Telangiectasia in Costa Rica: Clinical, laboratory and genetic characteristics                     | O. Porras et al             | Abstract only   | A                                        | N/A                                 | A                         | A                                                       | N/A           | B                     | A                          | A                     | 4     | Poor          | Fair                            |

| Title                                                                                                                                  | Author                  | Type of article | Representativeness of the exposed cohort | Selection of the non-exposed cohort | Ascertainment of exposure | Demonstration of interest not present at start of study | Comparability | Assessment of outcome | Was follow-up long enough? | Adequacy of follow-up | Stars | Quality (all) | Quality (comparability removed) |
|----------------------------------------------------------------------------------------------------------------------------------------|-------------------------|-----------------|------------------------------------------|-------------------------------------|---------------------------|---------------------------------------------------------|---------------|-----------------------|----------------------------|-----------------------|-------|---------------|---------------------------------|
| Ataxia-telangiectasia: Clinical, laboratorial and mutational analysis of patients from a reference center for primary immunodeficiency | C. M. A. Jacob et al    | Abstract only   | A                                        | N/A                                 | A                         | B                                                       | N/A           | B                     | B                          | A                     | 4     | Poor          | Fair                            |
| Ataxia-telangiectasia: Immunodeficiency and survival                                                                                   | N. J. H. van Os et al   | Full text       | A                                        | N/A                                 | A                         | B                                                       | N/A           | B                     | A                          | A                     | 5     | Poor          | Fair                            |
| Cytogenetic and molecular studies of siblings with ataxia telangiectasia followed for 7 years                                          | M. Renedo et al         | Full text       | A                                        | N/A                                 | A                         | A                                                       | N/A           | B                     | A                          | A                     | 6     | Poor          | Good                            |
| Deep Brain Stimulation in Rare Inherited Dystonias                                                                                     | I. Beaulieu-Boire et al | Full text       | A                                        | N/A                                 | A                         | A                                                       | N/A           | B                     | A                          | A                     | 6     | Poor          | Good                            |
| Diagnostic considerations in ataxia-telangiectasia                                                                                     | J. M. G. Jason et al    | Full text       | A                                        | N/A                                 | A                         | A                                                       | N/A           | B                     | A                          | A                     | 6     | Poor          | Good                            |

| Title                                                                                                                                           | Author              | Type of article | Representativeness of the exposed cohort | Selection of the non-exposed cohort | Ascertainment of exposure | Demonstration of interest not present at start of study | Comparability | Assessment of outcome | Was follow-up long enough? | Adequacy of follow-up   | Stars | Quality (all) | Quality (comparability removed) |
|-------------------------------------------------------------------------------------------------------------------------------------------------|---------------------|-----------------|------------------------------------------|-------------------------------------|---------------------------|---------------------------------------------------------|---------------|-----------------------|----------------------------|-------------------------|-------|---------------|---------------------------------|
| Do elevated serum IgM levels have to be included in probable diagnosis criteria of patients with ataxia-telangiectasia?                         | E. Azarsiz et al    | Full text       | A                                        | N/A                                 | A                         | B                                                       | N/A           | B                     | A                          | A                       | 5     | Poor          | Fair                            |
| Effects of inspiratory muscle training on lung volumes, respiratory muscle strength, and quality of life in patients with ataxia telangiectasia | E. Felix et al.     | Abstract only   | A                                        | N/A                                 | A                         | A                                                       | N/A           | B                     | Unknown - abstract only    | Unknown - abstract only | 4     | Poor          | Poor                            |
| Endocrine abnormalities in ataxia telangiectasia: findings from a national cohort                                                               | A. Nissenkorn et al | Full text       | A                                        | N/A                                 | A                         | B                                                       | N/A           | B                     | B                          | A                       | 4     | Poor          | Fair                            |
| Evaluation of infectious and non-infectious                                                                                                     | S. Bazregari et al  | Full text       | A                                        | N/A                                 | A                         | B                                                       | N/A           | B                     | Unable to determine        | A                       | 4     | Poor          | Fair                            |



| Title                                                                                     | Author               | Type of article | Representativeness of the exposed cohort | Selection of the non-exposed cohort | Ascertainment of exposure | Demonstration of interest not present at start of study | Comparability | Assessment of outcome | Was follow-up long enough? | Adequacy of follow-up | Stars | Quality (all) | Quality (comparability removed) |
|-------------------------------------------------------------------------------------------|----------------------|-----------------|------------------------------------------|-------------------------------------|---------------------------|---------------------------------------------------------|---------------|-----------------------|----------------------------|-----------------------|-------|---------------|---------------------------------|
| complications in patients with primary immunodeficiency                                   |                      |                 |                                          |                                     |                           |                                                         |               |                       |                            |                       |       |               |                                 |
| Functional parameter measurements in children with ataxia telangiectasia                  | E. Shenhod et al     | Full text       | A                                        | N/A                                 | A                         | B                                                       | N/A           | B                     | A                          | A                     | 5     | Poor          | Fair                            |
| Longitudinal analysis of the neurological features of ataxia-telangiectasia               | T. J. Jackson et al  | Full text       | A                                        | N/A                                 | A                         | B                                                       | N/A           | B                     | A                          | A                     | 5     | Poor          | Fair                            |
| Long-term nutritional and gastrointestinal aspects in patients with ataxia telangiectasia | A. Krauthammer et al | Full text       | A                                        | N/A                                 | A                         | B                                                       | N/A           | B                     | A                          | A                     | 5     | Poor          | Fair                            |
| Microbiological surveillance in lung disease in ataxia telangiectasia                     | J. M. Bhatt et al    | Full text       | A                                        | N/A                                 | A                         | B                                                       | N/A           | B                     | A                          | A                     | 5     | Poor          | Fair                            |

| Title                                                                                                              | Author               | Type of article | Representativeness of the exposed cohort | Selection of the non-exposed cohort | Ascertainment of exposure | Demonstration of interest not present at start of study | Comparability | Assessment of outcome | Was follow-up long enough? | Adequacy of follow-up | Stars | Quality (all) | Quality (comparability removed) |
|--------------------------------------------------------------------------------------------------------------------|----------------------|-----------------|------------------------------------------|-------------------------------------|---------------------------|---------------------------------------------------------|---------------|-----------------------|----------------------------|-----------------------|-------|---------------|---------------------------------|
| Morbidity and mortality from ataxia-telangiectasia are associated with ATM genotype                                | R. Micol et al       | Full text       | A                                        | N/A                                 | A                         | B                                                       | N/A           | B                     | A                          | A                     | 5     | Poor          | Fair                            |
| Neuromuscular abnormalities in ataxia telangiectasia: a clinical, electrophysiological and muscle ultrasound study | M. M. Verhagen et al | Full text       | A                                        | N/A                                 | A                         | A                                                       | N/A           | B                     | A                          | A                     | 6     | Poor          | Good                            |
| Ocular findings in Norwegian patients with ataxia-telangiectasia: a 5 year prospective cohort study                | R. Riise et al       | Full text       | A                                        | N/A                                 | A                         | A                                                       | N/A           | B                     | A                          | A                     | 6     | Poor          | Good                            |
| Phenotypic variations between affected siblings with ataxia-telangiectasia:                                        | T. Morio et al       | Full text       | A                                        | N/A                                 | A                         | B                                                       | N/A           | B                     | A                          | A                     | 5     | Poor          | Fair                            |

| Title                                                                                     | Author                   | Type of article | Representativeness of the exposed cohort | Selection of the non-exposed cohort | Ascertainment of exposure | Demonstration of interest not present at start of study | Comparability | Assessment of outcome | Was follow-up long enough? | Adequacy of follow-up | Stars | Quality (all) | Quality (comparability removed) |
|-------------------------------------------------------------------------------------------|--------------------------|-----------------|------------------------------------------|-------------------------------------|---------------------------|---------------------------------------------------------|---------------|-----------------------|----------------------------|-----------------------|-------|---------------|---------------------------------|
| ataxia-telangiectasia in Japan                                                            |                          |                 |                                          |                                     |                           |                                                         |               |                       |                            |                       |       |               |                                 |
| Pre-emptive Allogeneic Hematopoietic Stem Cell Transplantation in Ataxia Telangiectasia   | Bakhtiar, S et al        | Full text       | A                                        | N/A                                 | A                         | A                                                       | N/A           | B                     | A                          | A                     | 6     | Poor          | Good                            |
| Progressive Liver Disease in Patients With Ataxia Telangiectasia                          | Donath, H et al          | Full text       | A                                        | N/A                                 | A                         | B                                                       | N/A           | B                     | A                          | A                     | 5     | Poor          | Fair                            |
| Pulmonary function in adolescents with ataxia telangiectasia                              | S. McGrath-Morrow et al  | Full text       | A                                        | N/A                                 | A                         | A                                                       | N/A           | B                     | A                          | A                     | 6     | Poor          | Good                            |
| Safety and caregiver satisfaction with gastrostomy in patients with Ataxia Telangiectasia | M. A. Lefton-Greif et al | Full text       | A                                        | N/A                                 | A                         | B                                                       | N/A           | B                     | A                          | A                     | 5     | Poor          | Fair                            |

| Title                                                                                                                | Author                        | Type of article | Representativeness of the exposed cohort | Selection of the non-exposed cohort | Ascertainment of exposure | Demonstration of interest not present at start of study | Comparability | Assessment of outcome | Was follow-up long enough? | Adequacy of follow-up | Stars | Quality (all) | Quality (comparability removed) |
|----------------------------------------------------------------------------------------------------------------------|-------------------------------|-----------------|------------------------------------------|-------------------------------------|---------------------------|---------------------------------------------------------|---------------|-----------------------|----------------------------|-----------------------|-------|---------------|---------------------------------|
| Survival probability in ataxia telangiectasia                                                                        | T. O. Crawford et al          | Full text       | A                                        | N/A                                 | A                         | B                                                       | N/A           | B                     | A                          | A                     | 5     | Poor          | Fair                            |
| The feasibility and validity of forced spirometry in ataxia telangiectasia                                           | D. Vilozni et al              | Full text       | A                                        | N/A                                 | A                         | A                                                       | N/A           | A                     | A                          | A                     | 6     | Poor          | Good                            |
| Variability of immunodeficiency associated with ataxia telangiectasia and clinical evolution in 12 affected patients | G. G. M. Claret Teruel, et al | Full text       | A                                        | N/A                                 | A                         | B                                                       | N/A           | B                     | A                          | A                     | 5     | Poor          | Fair                            |
| Immune deficiency in Ataxia-Telangiectasia: a longitudinal study of 44 patients                                      | C. Chopra et al               | Full text       | A                                        | C                                   | A                         | B                                                       | None          | B                     | A                          | A                     | 5     | Poor          | Fair                            |
| Immunodeficiency in ataxia telangiectasia is correlated strongly with the presence                                   | E. R. Staples et al           | Full text       | A                                        | A                                   | A                         | B                                                       | None          | B                     | A                          | A                     | 6     | Poor          | Good                            |

| Title                                                                                                                                                | Author               | Type of article | Representativeness of the exposed cohort | Selection of the non-exposed cohort | Ascertainment of exposure | Demonstration of interest not present at start of study | Comparability           | Assessment of outcome   | Was follow-up long enough? | Adequacy of follow-up   | Stars | Quality (all) | Quality (comparability removed) |
|------------------------------------------------------------------------------------------------------------------------------------------------------|----------------------|-----------------|------------------------------------------|-------------------------------------|---------------------------|---------------------------------------------------------|-------------------------|-------------------------|----------------------------|-------------------------|-------|---------------|---------------------------------|
| of two null mutations in the ataxia telangiectasia mutated gene                                                                                      |                      |                 |                                          |                                     |                           |                                                         |                         |                         |                            |                         |       |               |                                 |
| Lymphoid tumours and breast cancer in ataxia telangiectasia; substantial protective effect of residual ATM kinase activity against childhood tumours | A. Reiman et al      | Full text       | A                                        | A                                   | A                         | B                                                       | None                    | B                       | A                          | A                       | 6     | Poor          | Good                            |
| Clinical features and genetic analysis of Taiwanese patients with the hyper IgM syndrome phenotype                                                   | W. I. H. Lee et al   | Abstract only   | C                                        | Unknown - abstract only             | D                         | Unknown - abstract only                                 | Unknown - abstract only | Unknown - abstract only | Unknown - abstract only    | Unknown - abstract only | 0     | Poor          | Poor                            |
| Clinical spectrum of ataxia-                                                                                                                         | M. M. Verhagen et al | Abstract only   | A                                        | A                                   | A                         | B                                                       | Unknown - abstract only | B                       | Unknown - abstract only    | A                       | 5     | Poor          | Good                            |

| Title                                                                                                | Author              | Type of article | Representativeness of the exposed cohort | Selection of the non-exposed cohort | Ascertainment of exposure | Demonstration of interest not present at start of study | Comparability           | Assessment of outcome | Was follow-up long enough? | Adequacy of follow-up   | Stars | Quality (all) | Quality (comparability removed) |
|------------------------------------------------------------------------------------------------------|---------------------|-----------------|------------------------------------------|-------------------------------------|---------------------------|---------------------------------------------------------|-------------------------|-----------------------|----------------------------|-------------------------|-------|---------------|---------------------------------|
| telangiectasia in adulthood                                                                          |                     |                 |                                          |                                     |                           |                                                         |                         |                       |                            |                         |       |               |                                 |
| Cranial MRI in ataxia-telangiectasia                                                                 | F. Sardanelli et al | Abstract only   | A                                        | N/A                                 | A                         | A                                                       | Unknown - abstract only | B                     | Unknown - abstract only    | Unknown - abstract only | 4     | Poor          | Poor                            |
| Effects of Inspiratory Muscle Training on Pulmonary Function in Patients With Ataxia-Telangiectasia  | E. Felix et al      | Abstract only   | A                                        | N/A                                 | A                         | A                                                       | Unknown - abstract only | B                     | Unknown - abstract only    | Unknown - abstract only | 4     | Poor          | Poor                            |
| Hepatic disease in ataxia-telangiectasia, diagnosed in institutonacional de pediatria in Mexico City | R. Laurel et al     | Abstract only   | A                                        | N/A                                 | A                         | B                                                       | Unknown - abstract only | B                     | A                          | A                       | 5     | Poor          | Fair                            |
| Immune status in ataxia telangiectasia                                                               | U. Datta et al      | Abstract only   | D                                        | N/A                                 | A                         | A                                                       | Unknown - abstract only | B                     | A                          | A                       | 5     | Poor          | Fair                            |
| Immunological evaluation in Brazilian ataxia                                                         | A. S. Grumach et al | Abstract only   | A                                        | N/A                                 | A                         | A                                                       | Unknown - abstract only | B                     | Unknown - abstract only    | Unknown - abstract only | 4     | Poor          | Poor                            |

| Title                                                                                                                                | Author                     | Type of article | Representativeness of the exposed cohort | Selection of the non-exposed cohort | Ascertainment of exposure | Demonstration of interest not present at start of study | Comparability           | Assessment of outcome | Was follow-up long enough? | Adequacy of follow-up | Stars | Quality (all) | Quality (comparability removed) |
|--------------------------------------------------------------------------------------------------------------------------------------|----------------------------|-----------------|------------------------------------------|-------------------------------------|---------------------------|---------------------------------------------------------|-------------------------|-----------------------|----------------------------|-----------------------|-------|---------------|---------------------------------|
| telangiectasia patients                                                                                                              |                            |                 |                                          |                                     |                           |                                                         |                         |                       |                            |                       |       |               |                                 |
| Late-breaking abstract: The Effect of lung volume deterioration on tidal volume, airway flows and life span in ataxia telangiectasia | D. Vilozni et al           | Abstract only   | A                                        | N/A                                 | A                         | B                                                       | Unknown - abstract only | B                     | A                          | A                     | 5     | Poor          | Fair                            |
| Liver Disease in Pediatric Patients With Ataxia Telangiectasia: A Novel Report                                                       | B. Weiss et al             | Abstract only   | A                                        | N/A                                 | A                         | B                                                       | Unknown - abstract only | B                     | A                          | A                     | 5     | Poor          | Fair                            |
| Longitudinal follow-up of lung function in ataxia telangiectasia                                                                     | D. Vilozni et al           | Abstract only   | D                                        | N/A                                 | A                         | B                                                       | Unknown - abstract only | B                     | A                          | A                     | 4     | Poor          | Poor                            |
| Neurocutaneous syndrome: A prospective study                                                                                         | R. S. Purkait et al        | Full text       | B                                        | N/A                                 | A                         | A                                                       | Unknown - abstract only | B                     | A                          | A                     | 6     | Poor          | Good                            |
| Nutritional evaluation and food habits in                                                                                            | B. T. Costa-Carvath, et al | Abstract only   | A                                        | N/A                                 | A                         | A                                                       | Unknown - abstract only | B                     | A                          | A                     | 6     | Poor          | Good                            |

| Title                                                                                                                   | Author            | Type of article | Representativeness of the exposed cohort | Selection of the non-exposed cohort | Ascertainment of exposure | Demonstration of interest not present at start of study | Comparability           | Assessment of outcome | Was follow-up long enough? | Adequacy of follow-up   | Stars | Quality (all) | Quality (comparability removed) |
|-------------------------------------------------------------------------------------------------------------------------|-------------------|-----------------|------------------------------------------|-------------------------------------|---------------------------|---------------------------------------------------------|-------------------------|-----------------------|----------------------------|-------------------------|-------|---------------|---------------------------------|
| patients with ataxia-telangiectasia (AT)                                                                                |                   |                 |                                          |                                     |                           |                                                         |                         |                       |                            |                         |       |               |                                 |
| Progressive liver disease in patients with ataxia telangiectasia                                                        | S. Woelke, et al. | Abstract only   | A                                        | N/A                                 | A                         | B                                                       | Unknown - abstract only | B                     | A                          | A                       | 5     | Poor          | Fair                            |
| Safety of live viral vaccines and retrospective review of immunologic status of 329 patients with ataxia telangiectasia | B. Uygungil et al | Abstract only   | A                                        | N/A                                 | A                         | B                                                       | Unknown - abstract only | B                     | A                          | A                       | 5     | Poor          | Fair                            |
| The clinical importance of performing forced spirometry in ataxia teleangiectasia                                       | D. Vilozni et al  | Abstract only   | D                                        | N/A                                 | A                         | A                                                       | Unknown - abstract only | B                     | Unknown - abstract only    | Unknown - abstract only | 3     | Poor          | Poor                            |
| The microbiology of lung disease in ataxia telangiectasia (AT)                                                          | J. Bhatt et al    | Abstract only   | A                                        | N/A                                 | A                         | A                                                       | Unknown - abstract only | A                     | B                          | A                       | 5     | Poor          | Good                            |



| Title                                                                                        | Author              | Type of article | Representativeness of the exposed cohort | Selection of the non-exposed cohort | Ascertainment of exposure | Demonstration of interest not present at start of study | Comparability           | Assessment of outcome | Was follow-up long enough? | Adequacy of follow-up | Stars | Quality (all) | Quality (comparability removed) |
|----------------------------------------------------------------------------------------------|---------------------|-----------------|------------------------------------------|-------------------------------------|---------------------------|---------------------------------------------------------|-------------------------|-----------------------|----------------------------|-----------------------|-------|---------------|---------------------------------|
| Twenty-year follow-up of 160 patients with ataxia-telangiectasia                             | F. Ersoy et al      | Abstract only   | A                                        | N/A                                 | A                         | B                                                       | Unknown - abstract only | A                     | A                          | A                     | 5     | Poor          | Fair                            |
| Ataxia Telangiectasia Diagnosed on Newborn Screening-Case Cohort of 5 Years' Experience      | Mandola AB et al    | Full text       | A*                                       | N/A                                 | A*                        | A*                                                      | None                    | B*                    | A*                         | A*                    | 5     | Poor          | Good                            |
| Functional parameter measurements in children with ataxia telangiectasia                     | Shenhod E et al     | Full text       | A*                                       | N/A                                 | A*                        | A*                                                      | None                    | B*                    | A*                         | A*                    | 5     | Poor          | Good                            |
| A clinical profile of 100 patients with ataxia telangiectasia seen at a tertiary care center | Mahadevappa M et al | Full text       | A*                                       | N/A                                 | A*                        | B                                                       | None                    | B*                    | A*                         | B*                    | 3     | Poor          | Fair                            |

| Title                                                                   | Author                  | Type of article | Representativeness of the exposed cohort | Selection of the non-exposed cohort | Ascertainment of exposure | Demonstration of interest not present at start of study | Comparability | Assessment of outcome | Was follow-up long enough? | Adequacy of follow-up | Stars | Quality (all) | Quality (comparability removed) |
|-------------------------------------------------------------------------|-------------------------|-----------------|------------------------------------------|-------------------------------------|---------------------------|---------------------------------------------------------|---------------|-----------------------|----------------------------|-----------------------|-------|---------------|---------------------------------|
| Does the Hyper IgM Phenotype Affect Prognosis in Ataxia Telangiectasia? | Haskologlu, ZS et al    | Full text       | A*                                       | N/A                                 | A*                        | A*                                                      | None          | B*                    | A*                         | A*                    | 5     | Poor          | Good                            |
| Clinical and immunological presentation of ataxia-telangiectasia.       | Oksana BOYARCHUK, et al | Full text       | A*                                       | N/A                                 | A*                        | B                                                       | None          | B*                    | A*                         | A*                    | 4     | Poor          | Fair                            |
| Growth in ataxia telangiectasia                                         | Natale VAI et al        | Full text       | A*                                       | N/A                                 | A*                        | B                                                       | None          | B*                    | A*                         | A*                    | 4     | Poor          | Fair                            |
